# Supplementary material for: The Antifungal Protein AfpB Induces Regulated Cell Death in Its Parental Fungus Penicillium digitatum
Source: PubMed Central journal article supplement (PMC7449623; doi:10.1128/msphere.00595-20), 2020-08-26

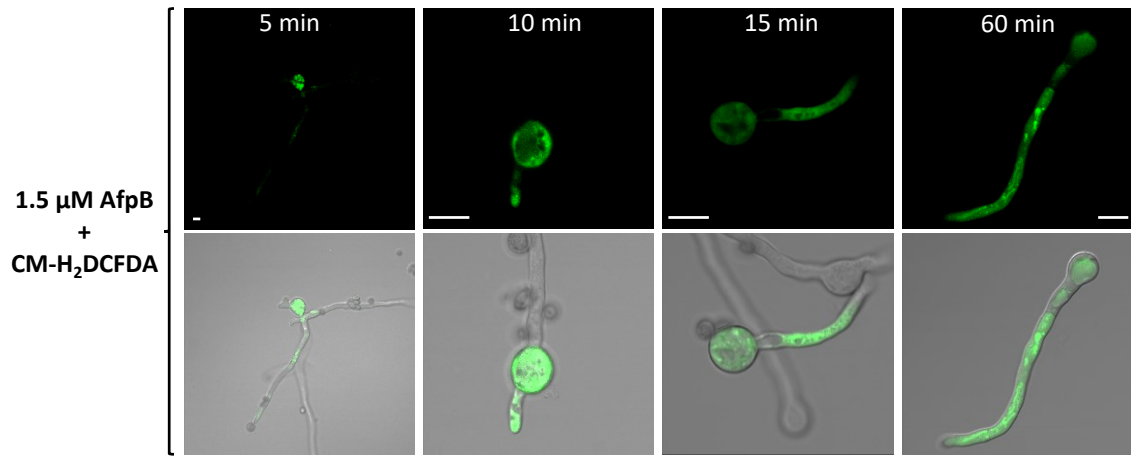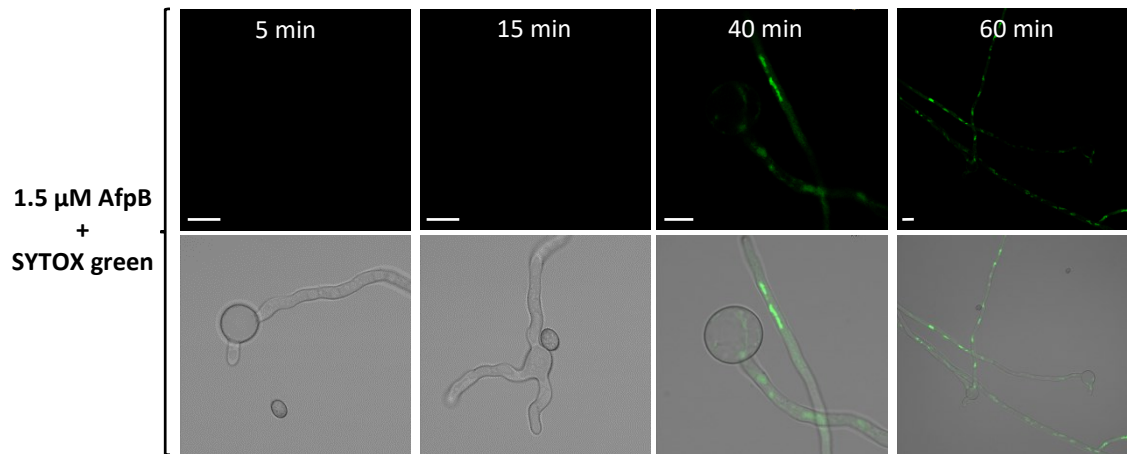

Supplement: mSphere.00595-20-sf003.pdf [file mSphere.00595-20-sf003.pdf]
